# Supplementary material for: Novel Peptide Sequences with ACE-Inhibitory and Antioxidant Activities Derived from the Heads and Bones of Hybrid Groupers (Epinephelus lanceolatus × Epinephelus fuscoguttatus)
Source: MDPI journal article supplement (doi:10.3390/foods11243991), 2022-12-09
Supplement: s1 [file s1]

## Supplementary Material

**Table S1: List of peptide sequences with potential ACE-inhibitory and antioxidant activities identified in HB-IV fraction.**

| Identified peptide sequences* | Observed mass (Da) | Peptide sequences reported in BIOPEP database <sup>#</sup> | Identified peptide sequences* | Observed mass (Da) | Peptide sequences reported in BIOPEP database <sup>#</sup> | Identified peptide sequences* | Observed mass (Da) | Peptide sequences reported in BIOPEP database <sup>#</sup> |
|-------------------------------|--------------------|------------------------------------------------------------|-------------------------------|--------------------|------------------------------------------------------------|-------------------------------|--------------------|------------------------------------------------------------|
| LRL                           | 300.28             | RL; LR                                                     | MLLP                          | 472.27             | LLP                                                        | MPVE                          | 474.21             | VE                                                         |
| LLAL                          | 428.30             | LA                                                         | DLDLR                         | 630.33             | LR                                                         | LGLL                          | 414.28             | LG; GL                                                     |
| VAAL                          | 372.24             | VAA; AA                                                    | VFLAK                         | 576.36             | VF; LA                                                     | LGFL                          | 448.27             | GF; LG                                                     |
| LVVL                          | 442.32             | VVL                                                        | LDDLRL                        | 630.33             | LR                                                         | TLPF                          | 476.26             | LPF                                                        |
| FVSY                          | 514.24             | SY                                                         | LAGVL                         | 471.31             | AG; LA; GV                                                 | GPAGPL                        | 510.28             | GPL; PL; GPA; AG; GP; AGP                                  |
| VVGL                          | 386.25             | VG; GL                                                     | MEPEP                         | 601.24             | ME                                                         | MLGGPV                        | 572.30             | GP; GG; LG; GPV                                            |
| AAAL                          | 344.21             | AA                                                         | MPDLR                         | 630.32             | LR                                                         | DLDGPD                        | 630.25             | GP; DG                                                     |
| LGGL                          | 358.22             | LG; GL; GG                                                 | ETRLL                         | 630.37             | RL                                                         | LSFL                          | 478.28             | SF                                                         |
| LAAL                          | 386.25             | AA; LAA; LA                                                | LASVL                         | 501.32             | LA                                                         | LDAGF                         | 521.25             | GF; AG; DA                                                 |
| LGAL                          | 372.24             | LG; GA                                                     | FADTF                         | 599.26             | TF                                                         | VAFN                          | 449.23             | AF; VAF                                                    |
| AVVL                          | 400.27             | AV; AVV; VVL                                               | NNDLR                         | 630.31             | LR                                                         | LYLF                          | 554.31             | YL; LF; LY                                                 |
| LATL                          | 416.26             | LA                                                         | LLTLR                         | 614.41             | LR                                                         | LGSF                          | 422.22             | SF; LG; GS                                                 |
| LGVL                          | 400.27             | LG; GV; LGV                                                | VGSPL                         | 471.27             | PL; VG; GS                                                 | GLVL                          | 400.27             | LVL; GL                                                    |
| LDAL                          | 430.24             | DA                                                         | KTEAT                         | 548.28             | EA; TE                                                     | TDAL                          | 418.21             | DA                                                         |
| AGPL                          | 356.21             | GPL; GP; PL; AG; AGP                                       | SDGNQ                         | 519.19             | DG                                                         | EASL                          | 418.21             | EA; ASL                                                    |
| PCLN                          | 445.20             | LN                                                         | NLLPA                         | 526.31             | LLP                                                        | AVGV                          | 344.21             | GV; AV; VG                                                 |
| AGVL                          | 358.22             | GV; AG                                                     | LTAGL                         | 473.28             | GL; AG                                                     | GVGH                          | 368.18             | GV; GH; VG                                                 |
| LLGL                          | 414.28             | GL; LG                                                     | MGGVF                         | 509.23             | VF; GV; MG; GG                                             | AVGL                          | 358.22             | VG; GL; AV                                                 |

Table S1 (*continued*)

| Identified peptide sequences* | Observed mass (Da) | Peptide sequences reported in BIOPEP database <sup>#</sup> | Identified peptide sequences* | Observed mass (Da) | Peptide sequences reported in BIOPEP database <sup>#</sup> | Identified peptide sequences* | Observed mass (Da) | Peptide sequences reported in BIOPEP database <sup>#</sup> |
|-------------------------------|--------------------|------------------------------------------------------------|-------------------------------|--------------------|------------------------------------------------------------|-------------------------------|--------------------|------------------------------------------------------------|
| FLGM                          | 466.23             | LG; GM                                                     | LEAL                          | 444.26             | EA                                                         | LVRGPR                        | 696.44             | LVR; PR; GP; VR; RG; VRGP                                  |
| LGDL                          | 416.23             | LG; GD                                                     | FDLK                          | 521.28             | LK                                                         | LVGRPR                        | 696.44             | GRP; PR; RP; VG; GR                                        |
| VGLL                          | 400.27             | GL; VG                                                     | FCVH                          | 504.22             | FC                                                         | HLSAFT                        | 674.34             | AF; HL                                                     |
| AFLK                          | 477.30             | AFL; AF                                                    | LPML                          | 472.27             | LPM                                                        | GPAKSP                        | 555.30             | GPA; GP                                                    |
| DPLL                          | 456.26             | PL                                                         | LSVLK                         | 558.37             | LK; SVL                                                    | LVCGHL                        | 640.34             | GH; HL                                                     |
| EVVE                          | 474.23             | EV; VE                                                     | DLVDLK                        | 701.40             | LK                                                         | EVLGVL                        | 628.38             | GV; LG; EV; LGV                                            |
| LGME                          | 448.20             | LG; GM; ME                                                 | FELNVT                        | 721.36             | EL                                                         | EDTLAKL                       | 788.43             | LA; KL                                                     |
| LGPL                          | 398.25             | GPL; PL; GP; LG; LGP                                       | LEAK                          | 459.27             | EAK; EA                                                    | KDLVDKL                       | 829.49             | KL                                                         |
| LNFL                          | 505.29             | LNF; NF; LN                                                | LACH                          | 442.20             | LA; LAC                                                    | VMAPDAR                       | 758.37             | DA                                                         |
| VALF                          | 448.27             | LF                                                         | LKLF                          | 519.34             | LK; LF; KL; LKL                                            | YPGLADMR                      | 921.44             | YP; PGL; LA; GL; PG; YPG; DM                               |
| ALFL                          | 462.28             | LF                                                         | ELAY                          | 494.24             | AY; LAY; LA; EL                                            | PPACLTAL                      | 784.42             | PP                                                         |
| EGLM                          | 448.20             | EG; GL                                                     | MMVF                          | 542.22             | MM; VF                                                     | DLSNADLR                      | 902.45             | LR                                                         |
| DLVE                          | 474.23             | VE; LVE                                                    | YLDLK                         | 650.36             | YL; LK                                                     | TEANGPAVT                     | 858.41             | GPA; GP; EA; NG; TE; AV                                    |
| TDYLMK                        | 769.37             | TDY; YL, DY                                                | TALALK                        | 615.40             | LA; LK                                                     | LAFL                          | 463.28             | LA; AF; AFL                                                |

Table S1 (*continued*)

| Identified peptide sequences* | Observed mass (Da) | Peptide sequences reported in BIOPEP database <sup>#</sup> | Identified peptide sequences* | Observed mass (Da) | Peptide sequences reported in BIOPEP database <sup>#</sup> | Identified peptide sequences* | Observed mass (Da) | Peptide sequences reported in BIOPEP database <sup>#</sup> |
|-------------------------------|--------------------|------------------------------------------------------------|-------------------------------|--------------------|------------------------------------------------------------|-------------------------------|--------------------|------------------------------------------------------------|
| YPGLWMR                       | 921.45             | LW; YP; PGL; GL; PG; YPG; WM; LWM                          | HGVFK                         | 586.32             | VFK; GV; HG; VF                                            | VAVL                          | 400.27             | AVL; AV; VAV                                               |
| VLRL                          | 499.35             | LR; RL                                                     | GMSGK                         | 478.22             | GM; GK; SG                                                 | LFDF                          | 540.26             | LF; DF                                                     |
| LAVH                          | 438.26             | LA; AV                                                     | MPLLM                         | 619.31             | PL                                                         | FAGL                          | 406.22             | AG; GL                                                     |

\* Amino acids are designated using their one-letter codes.

<sup>#</sup> BIOPEP database (Minkiewicz *et al.*, 2019) (accessed on July 2021)
